# Supplementary material for: Setting Priorities in River Management Using Habitat Suitability Models
Source: MDPI journal article supplement (doi:10.3390/w13070886), 2021-03-24

## 1. Number of missing taxa

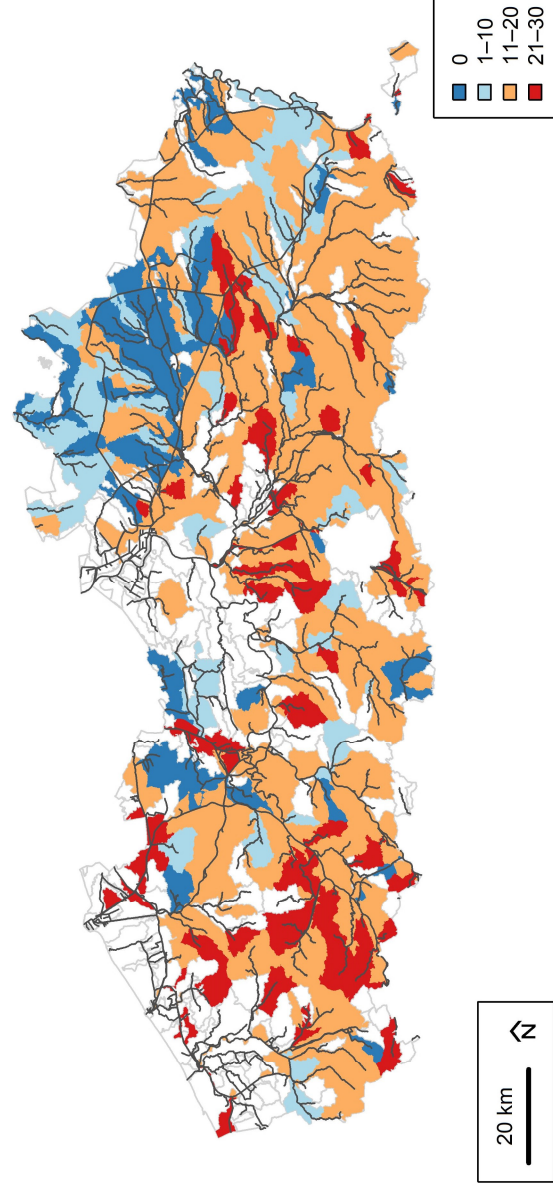

## 2. Number of limiting variables

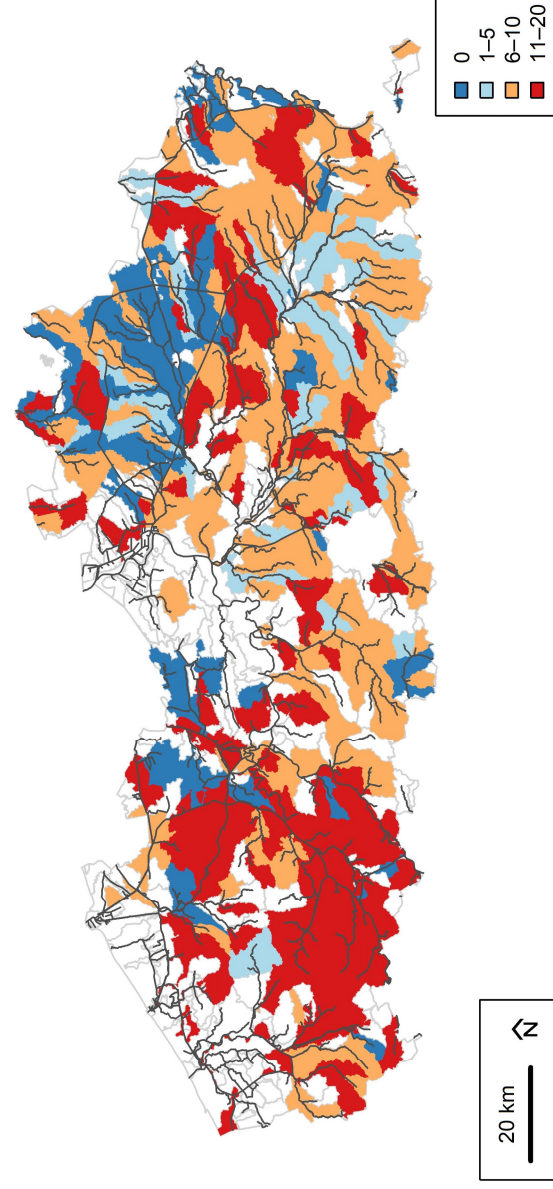

### 3. Width erosion

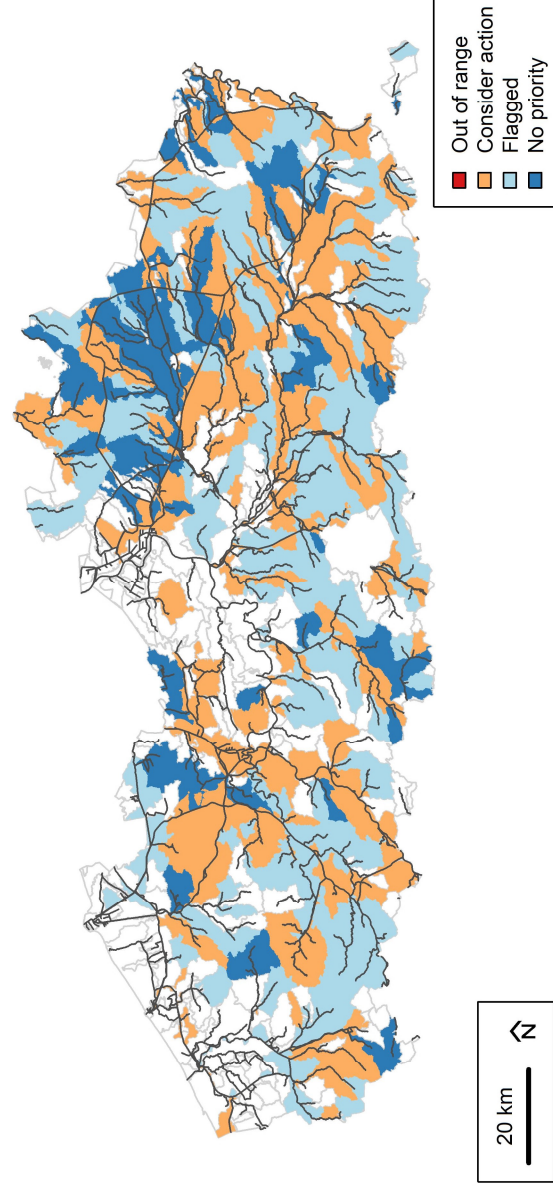

### 4. Width variation

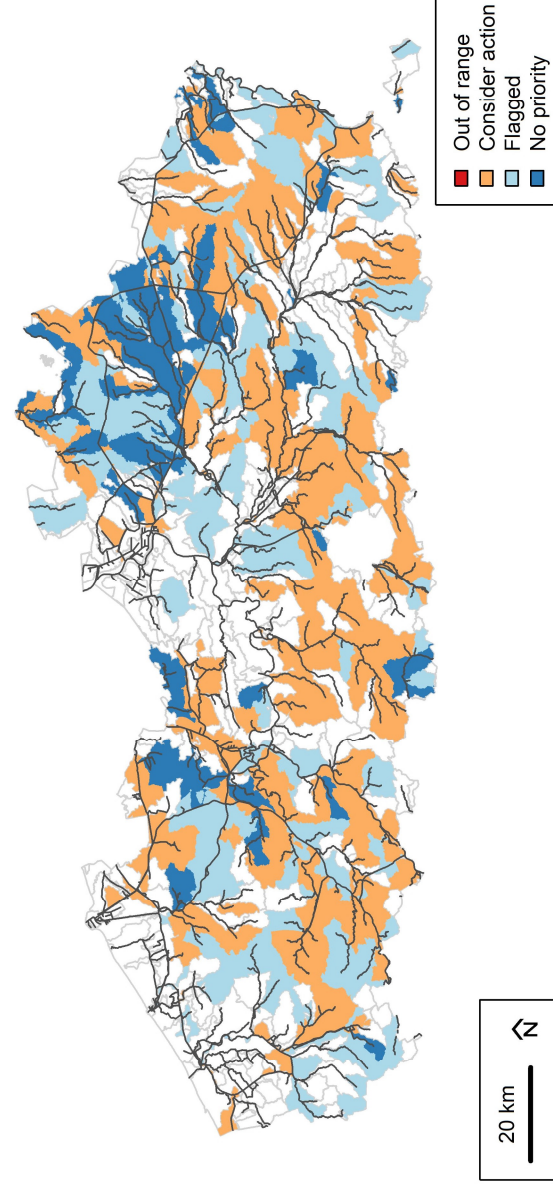

## 5. Curvature erosion

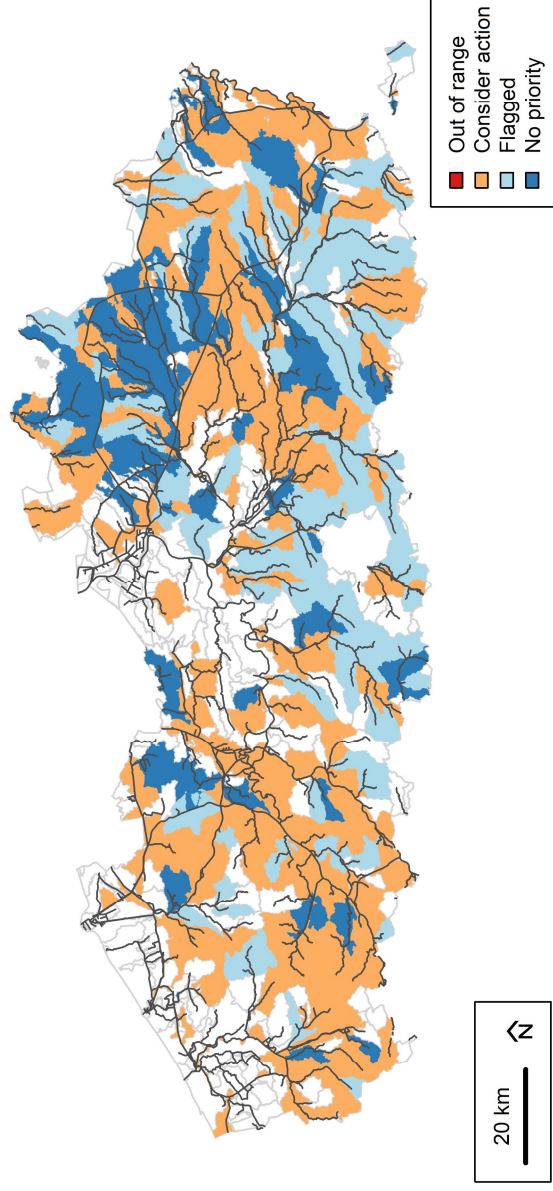

## 6. Micromeandering

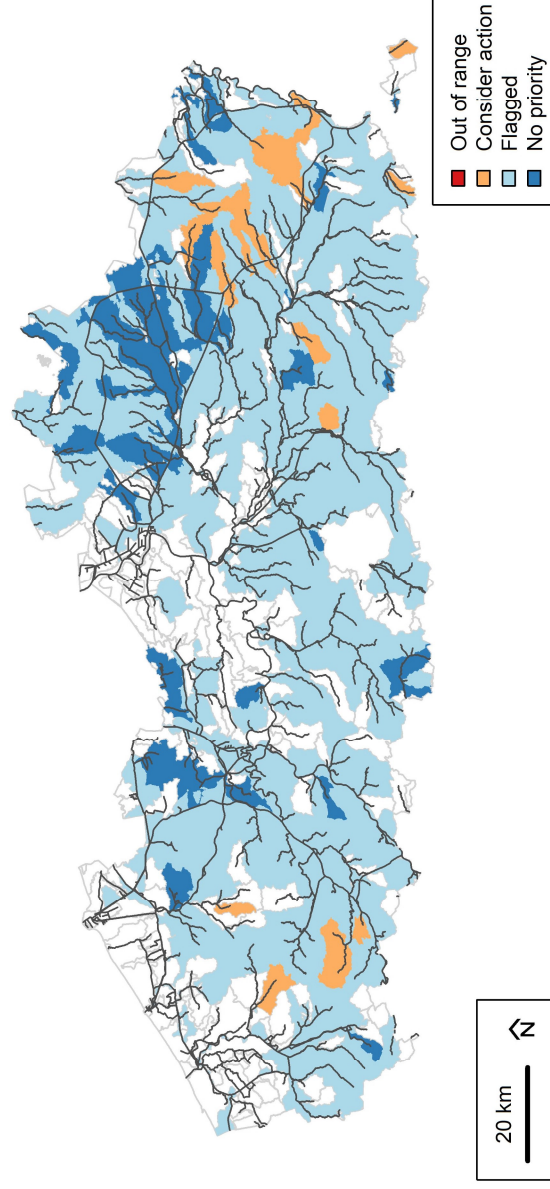

## 7. Sludge layer depth

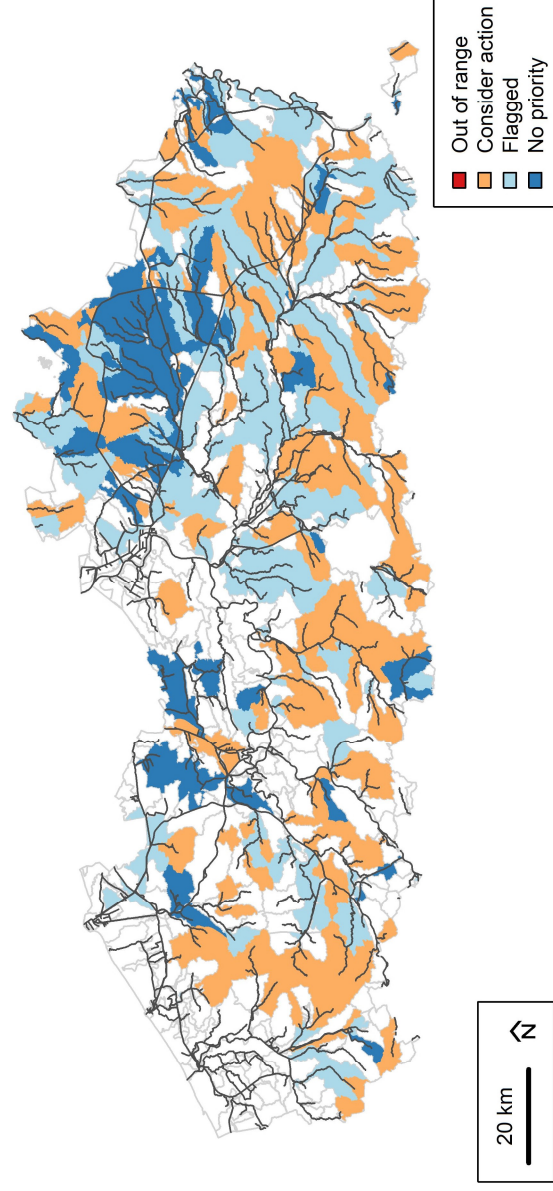

## 8. Presence of algae

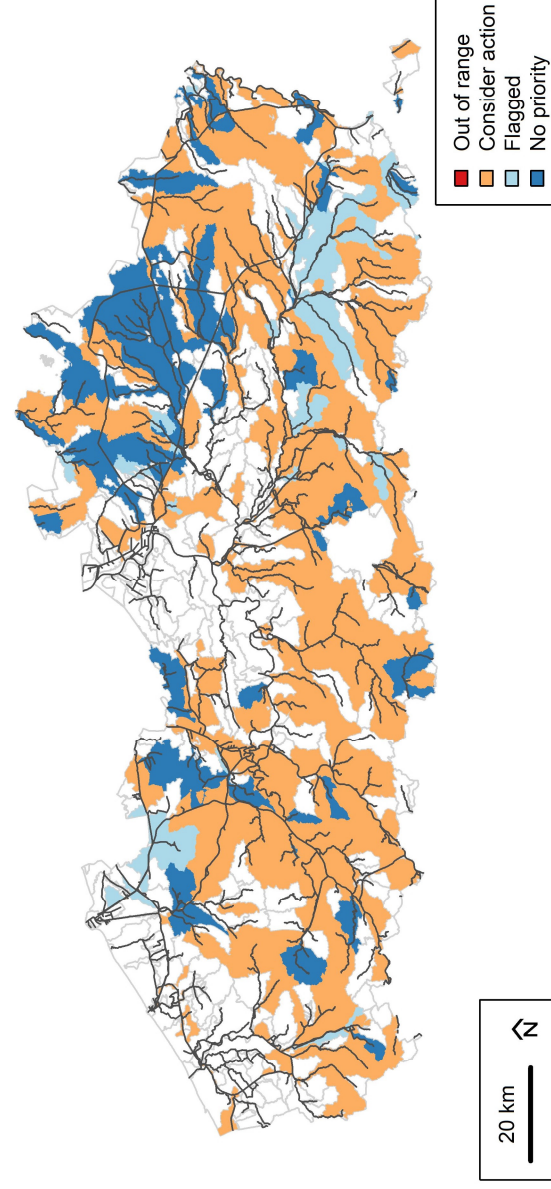

## 9. Presence of macrophytes

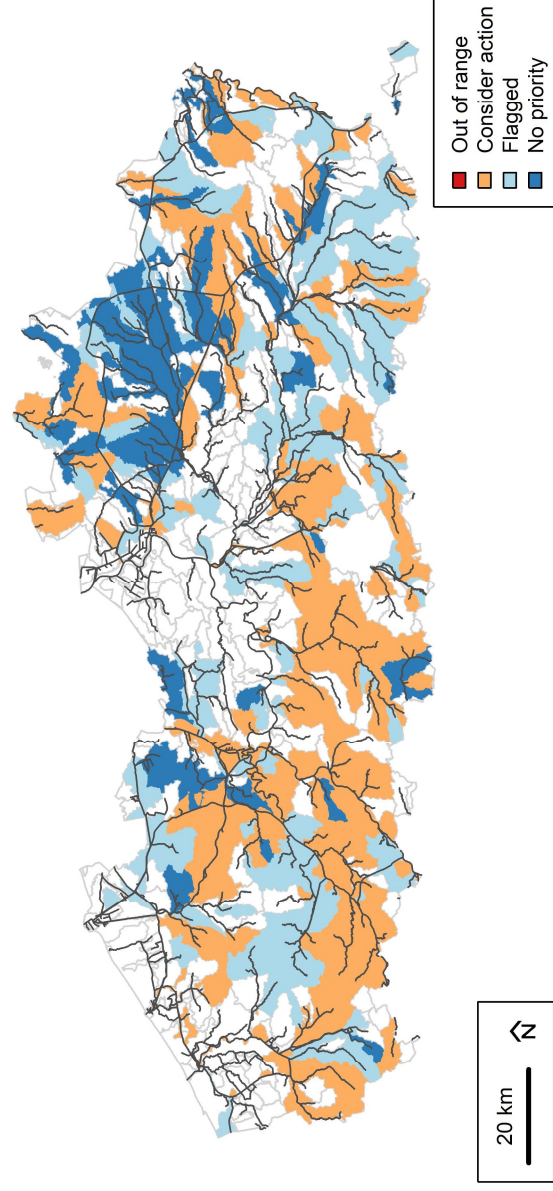

## 10. pH

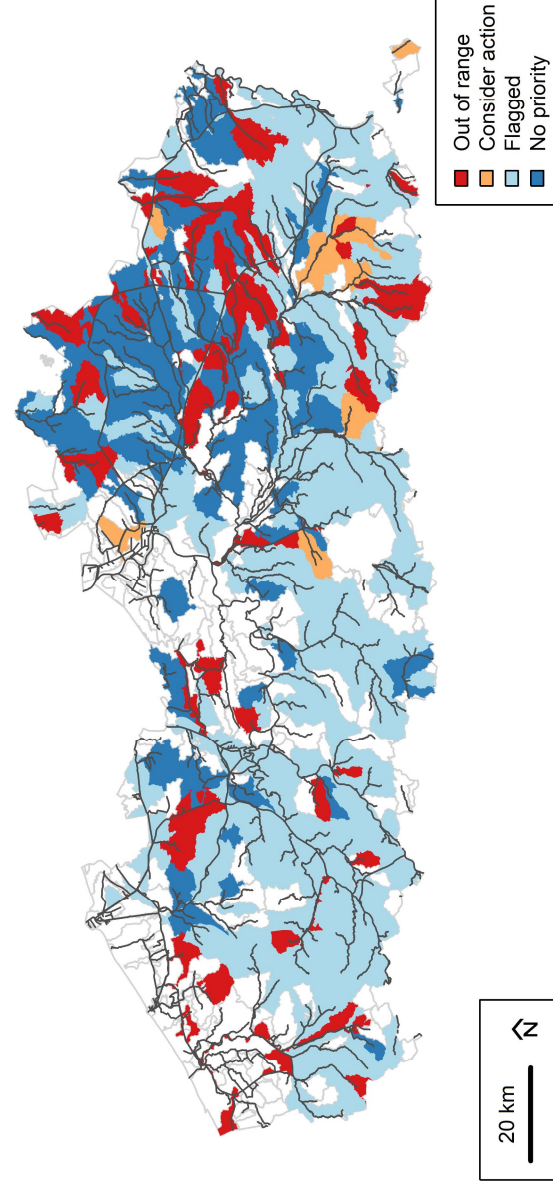

## 11. Temperature

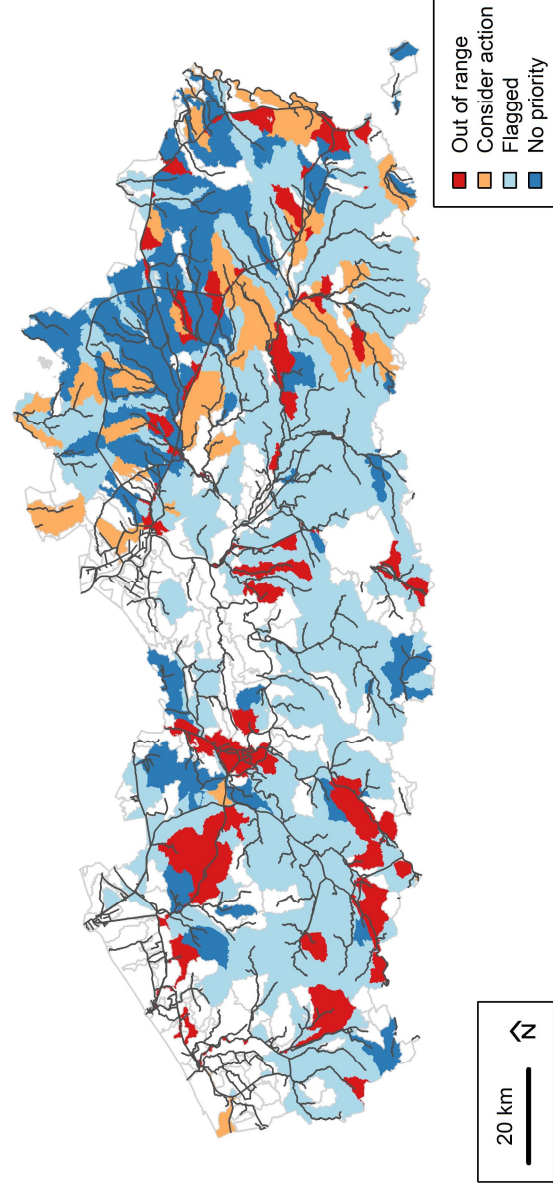

## 12. Chloride concentration

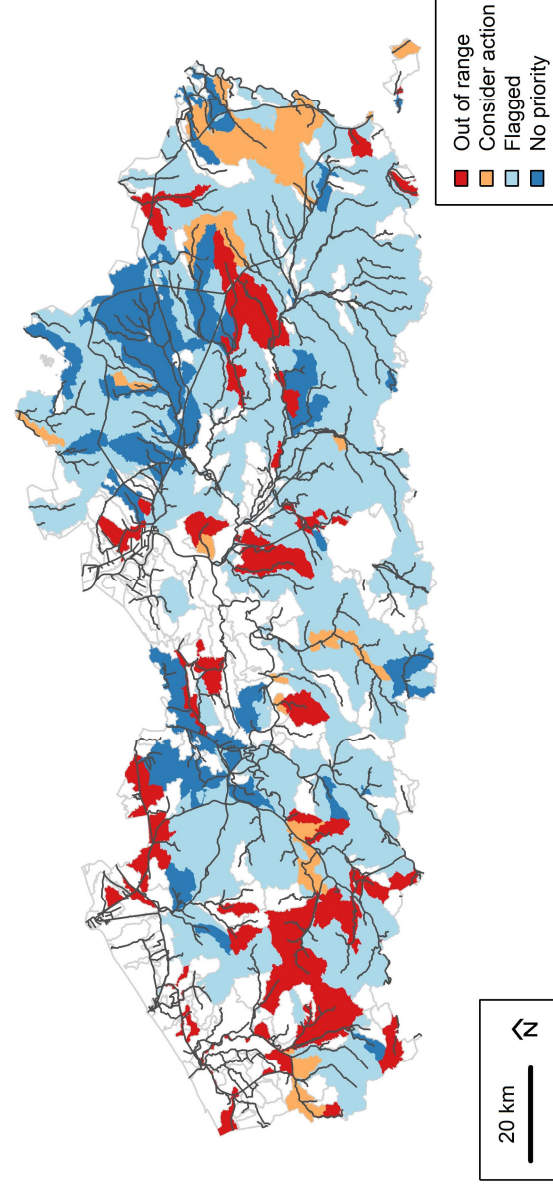

### 13. Electrical conductivity

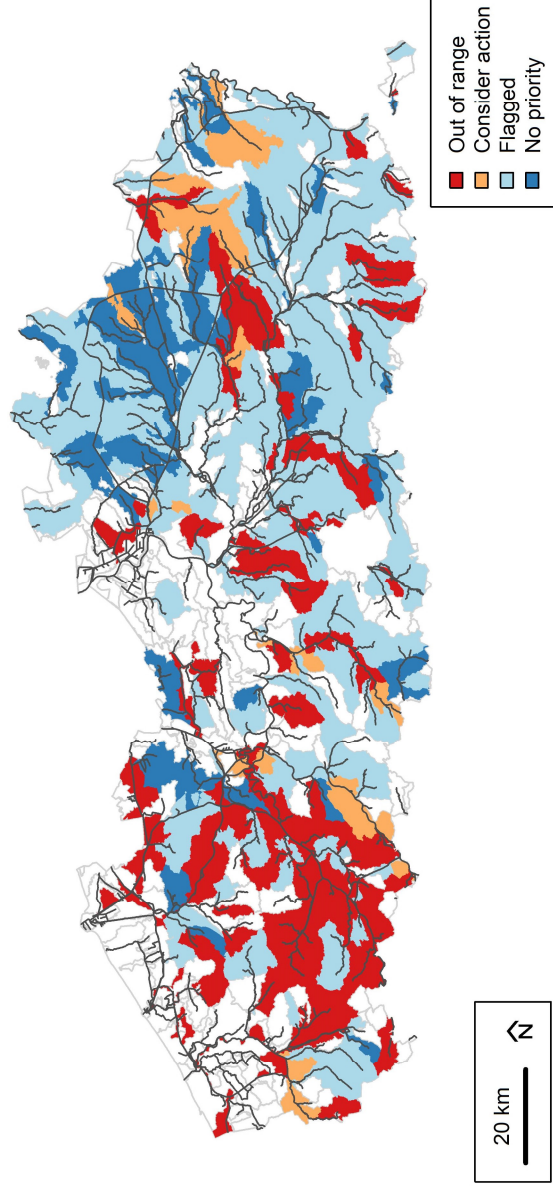

### 14. Kjeldahl Nitrogen concentration

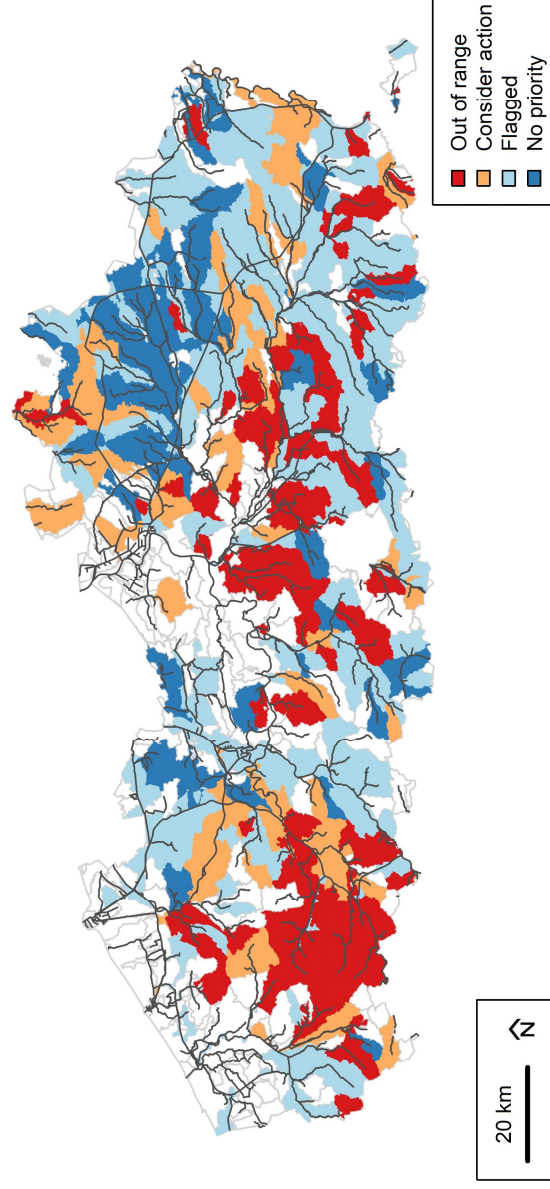

### 15. Nitrate-nitrogen concentration

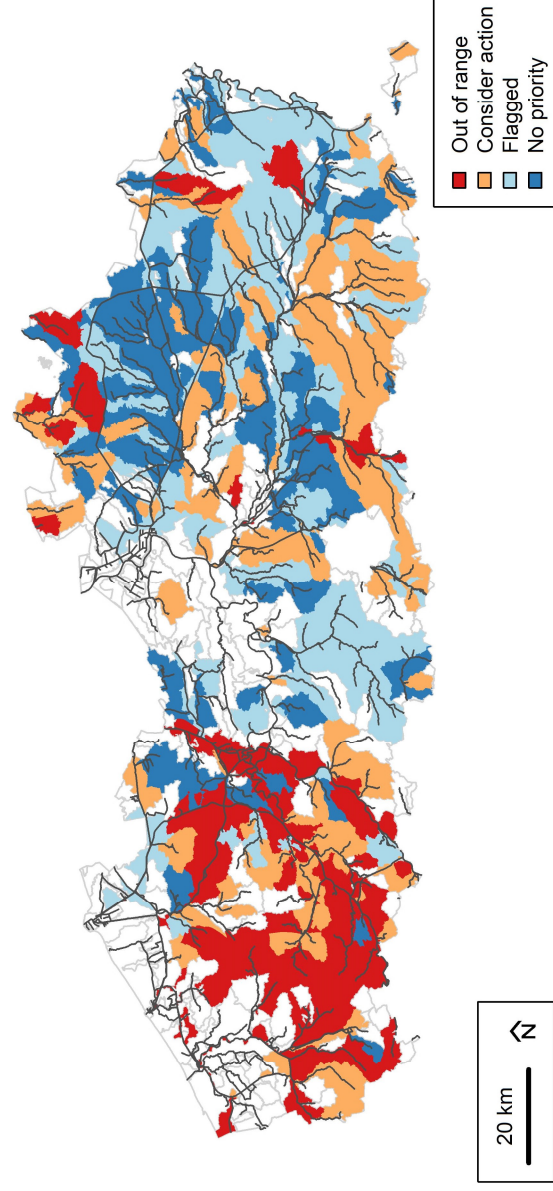

### 16. Orthophosphate-phosphorus concentration

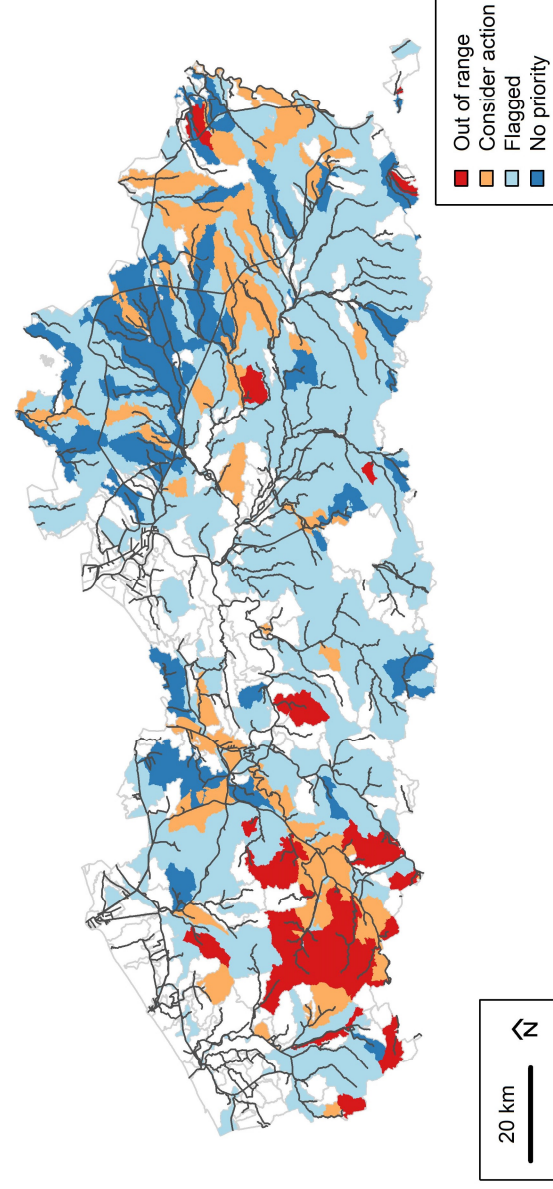

### 17. Suspended solids

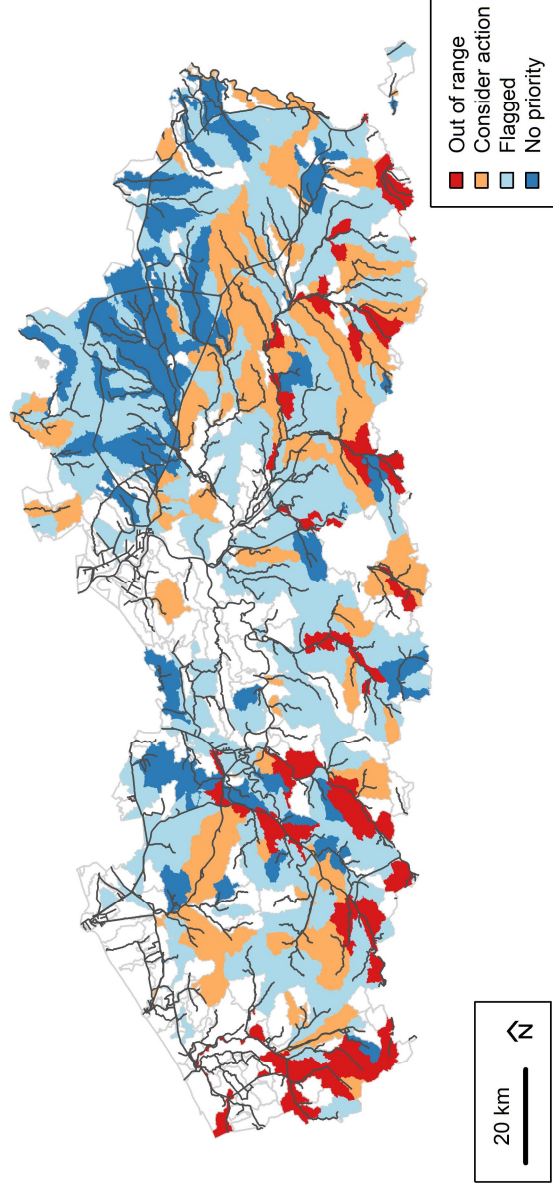

### 18. Bank structure

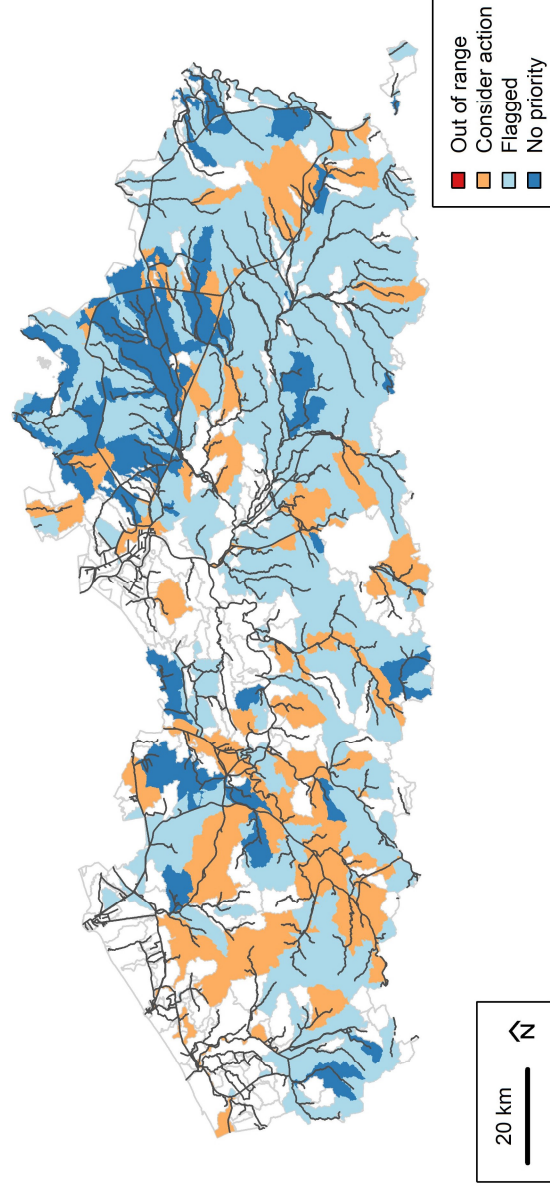

## 19. Chemical oxygen demand

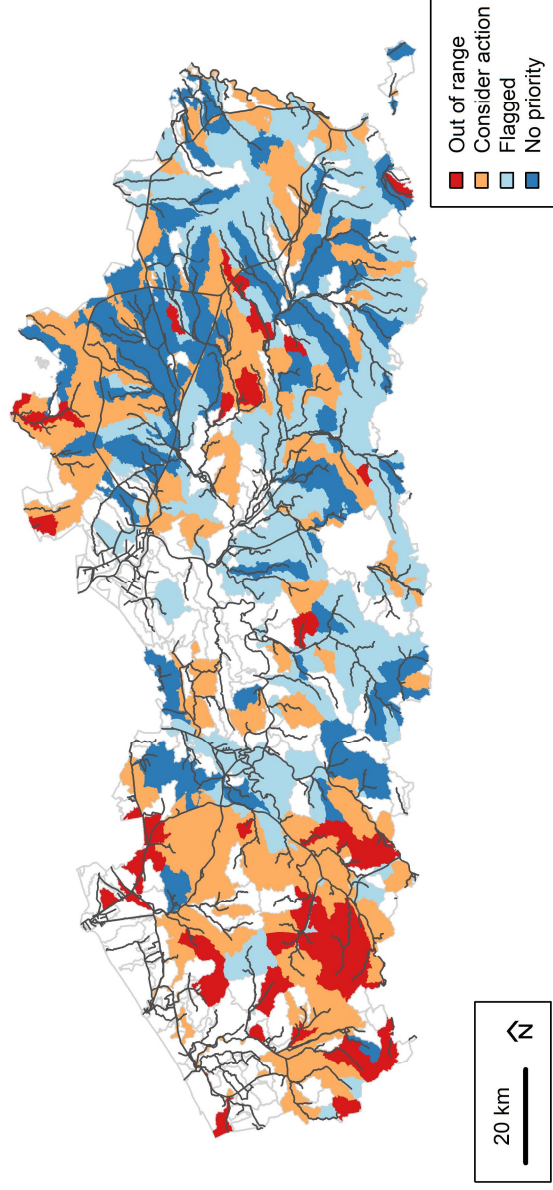

## 20. Oxygen saturation

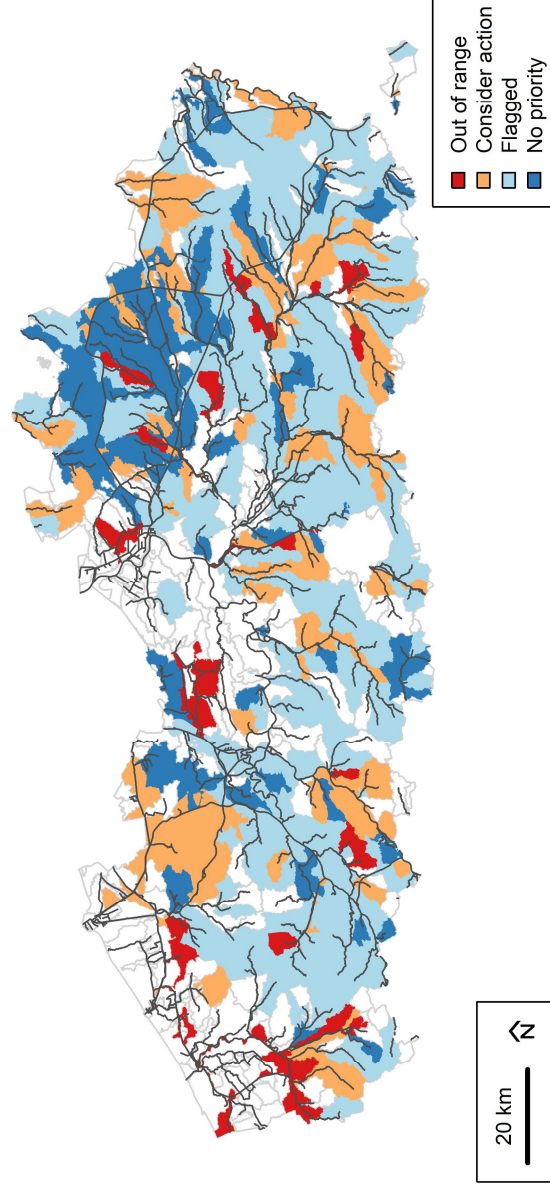

## 21. Biological oxygen demand

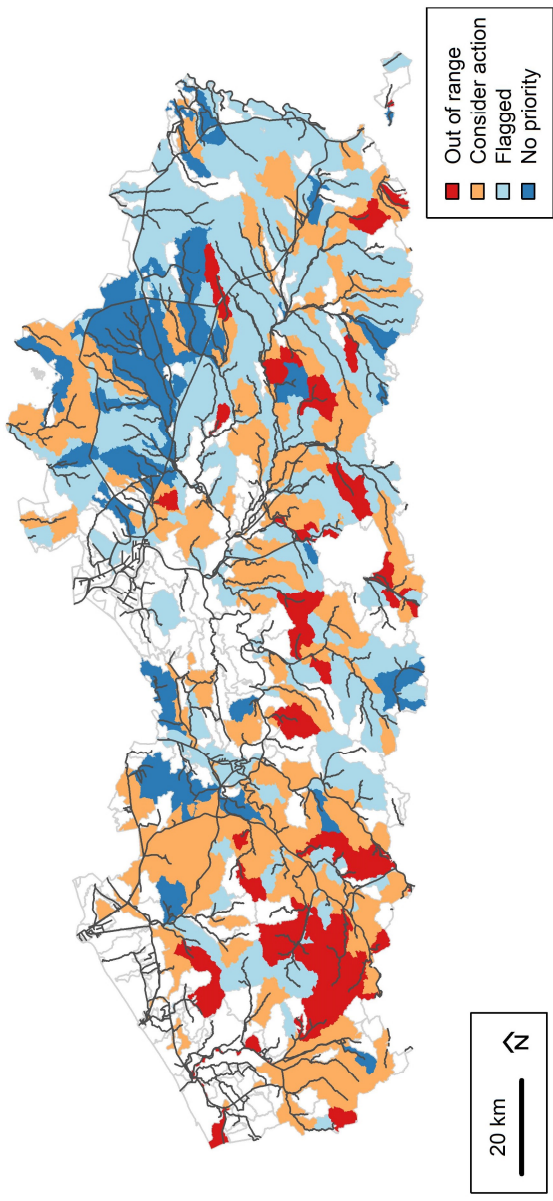

## 22. Total phosphorus concentration

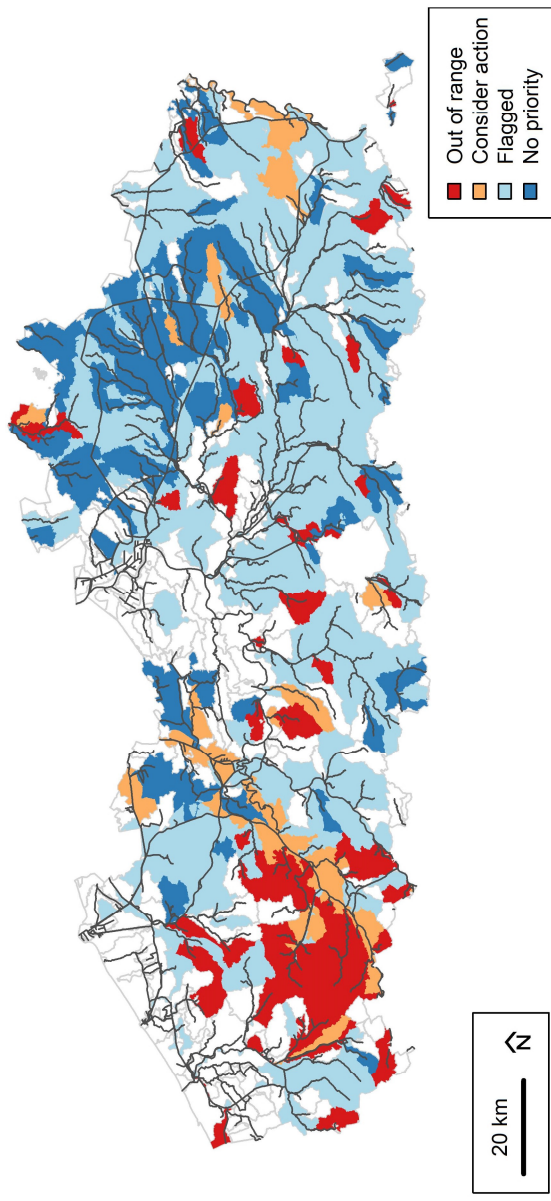

### 23. Overhanging vegetation

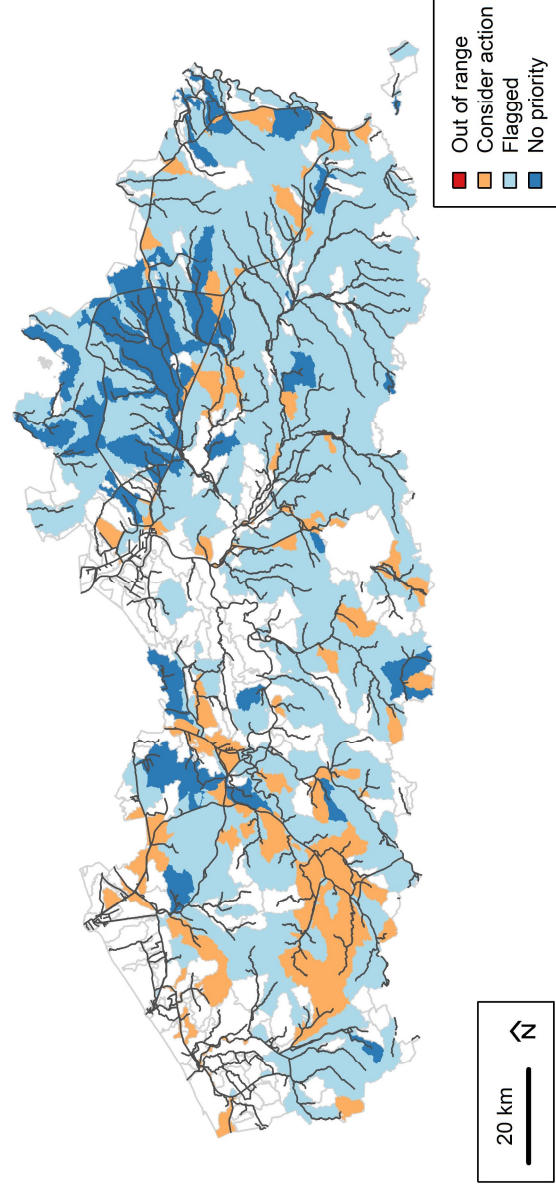

### 24. Stream variation

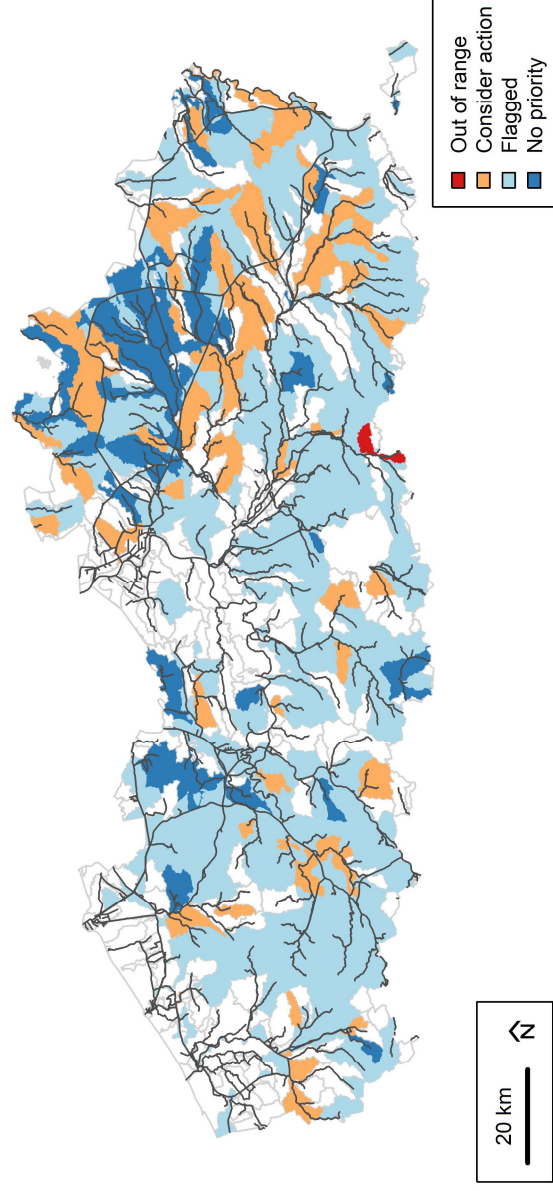

## 25. Width

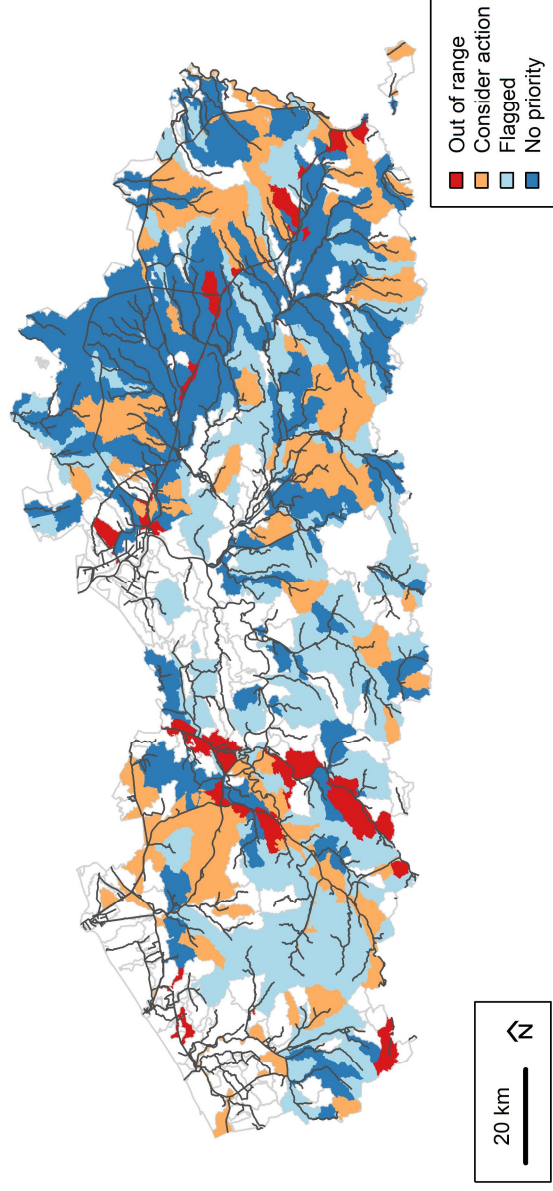

## 26. Oxygen concentration

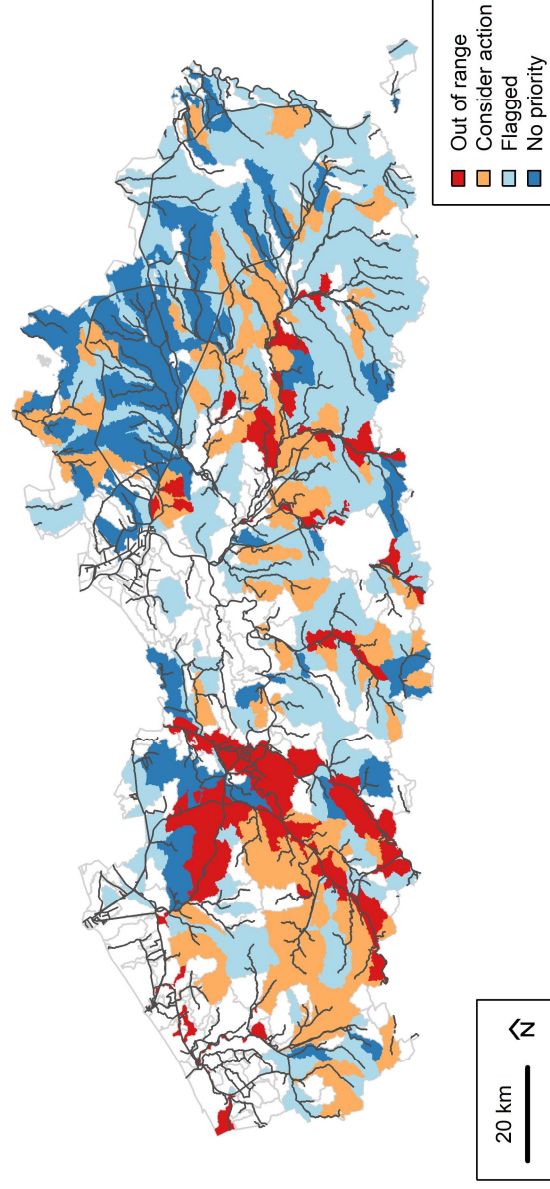

## 27. Presence of dead wood

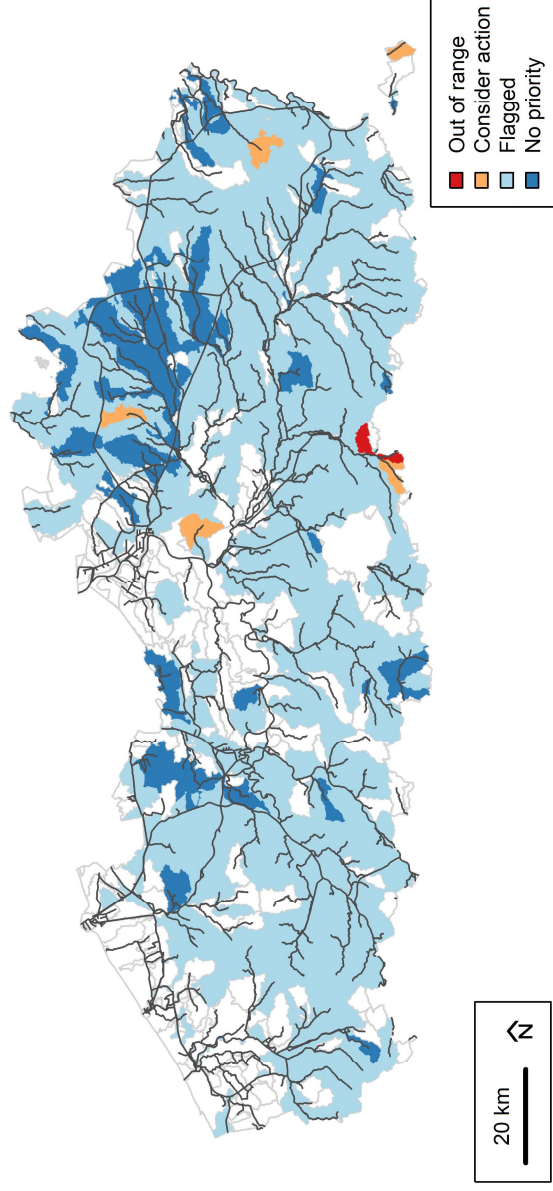

## 28. Presence of sediment banks

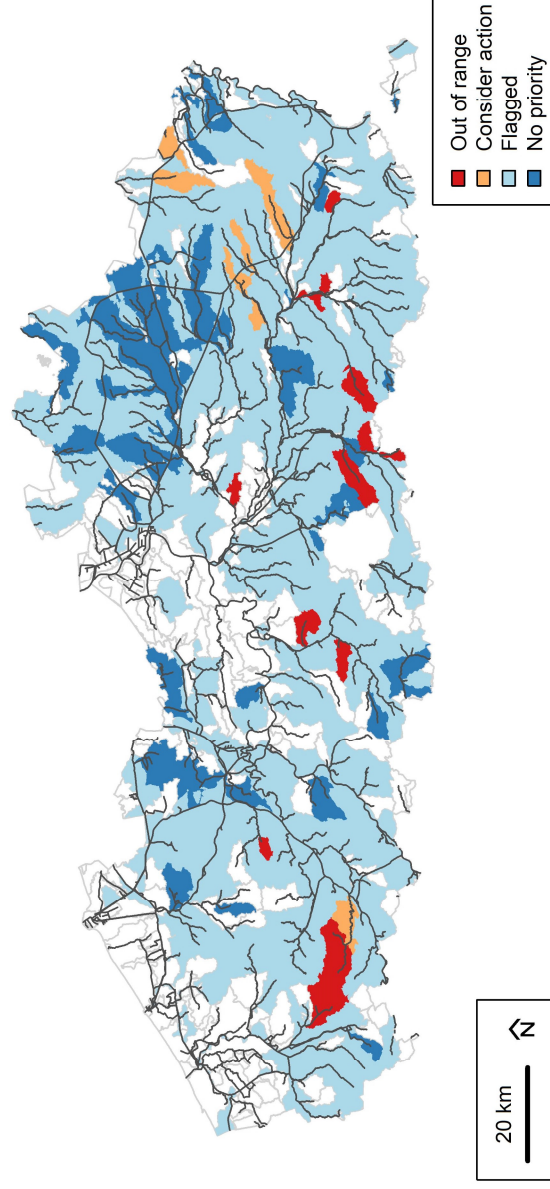

## 29. Lateral connectivity

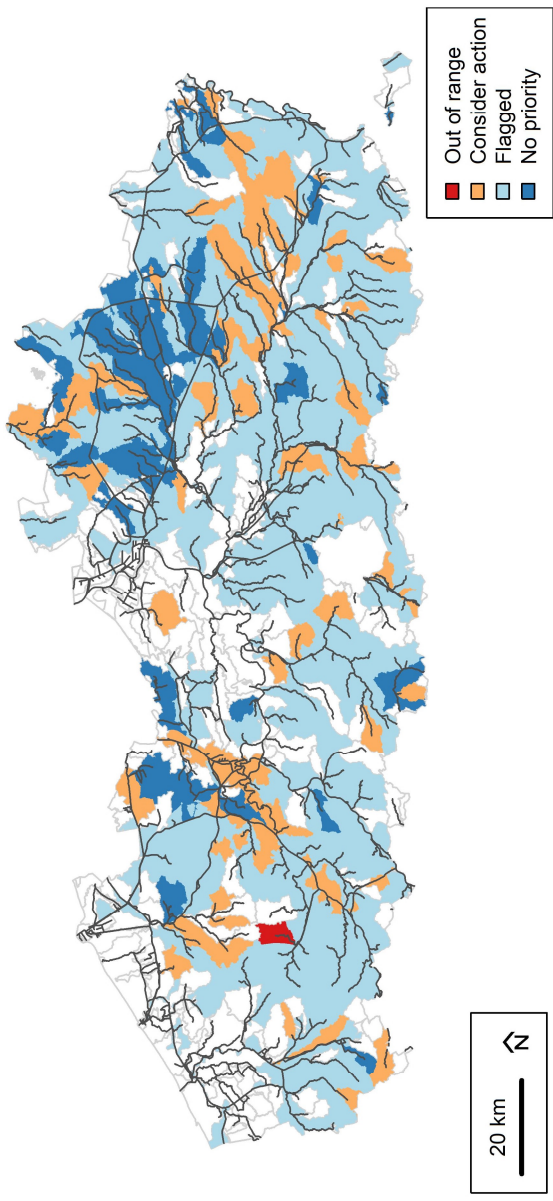

## 30. Presence of water-related elements

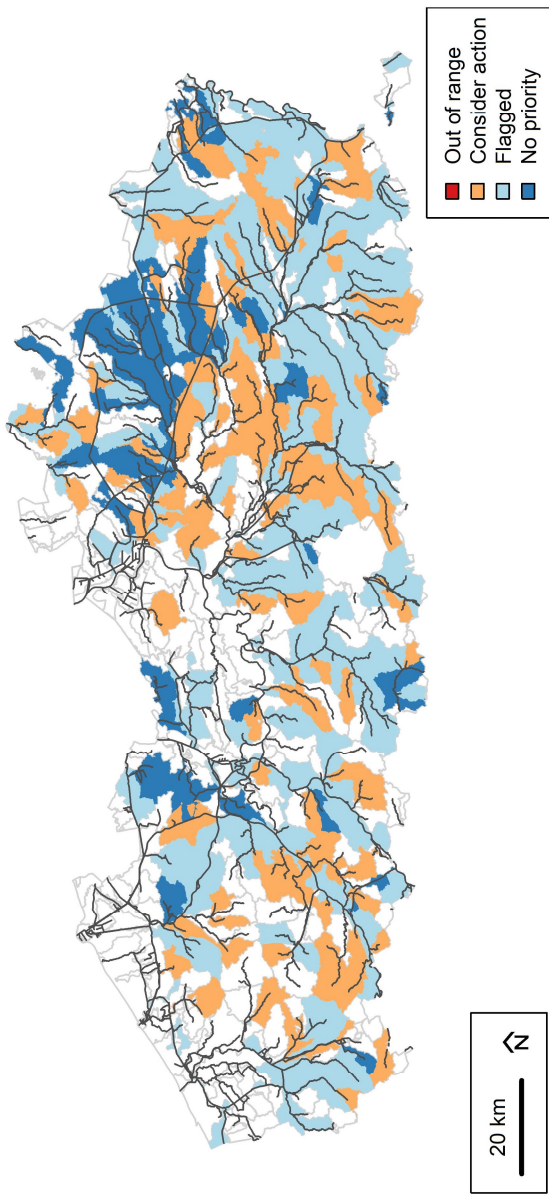

### 31. Pool-riffle pattern

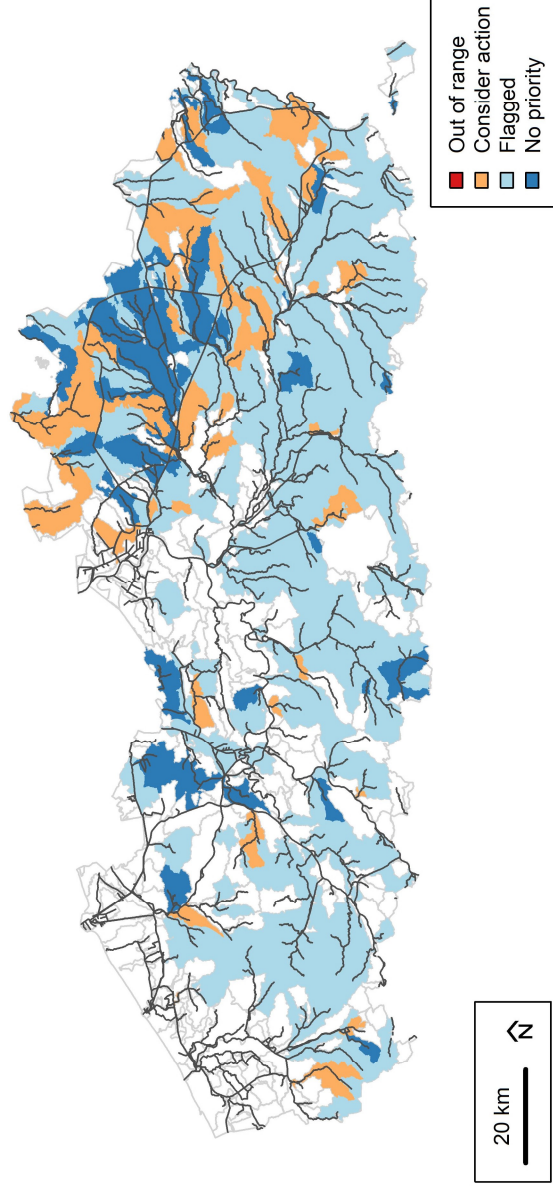

### 32. Depth

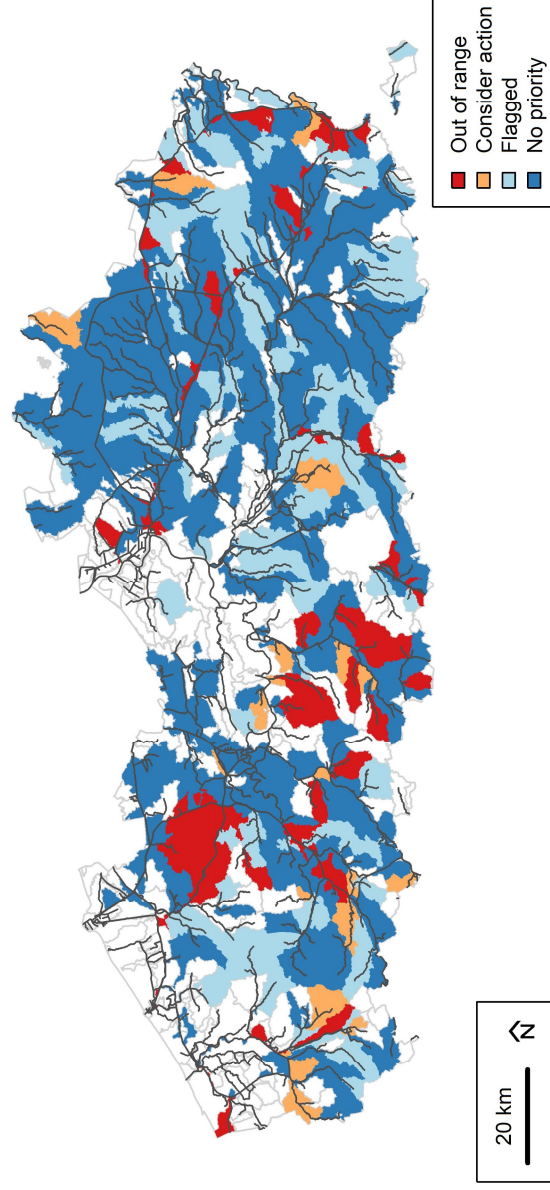

### 33. Substrate

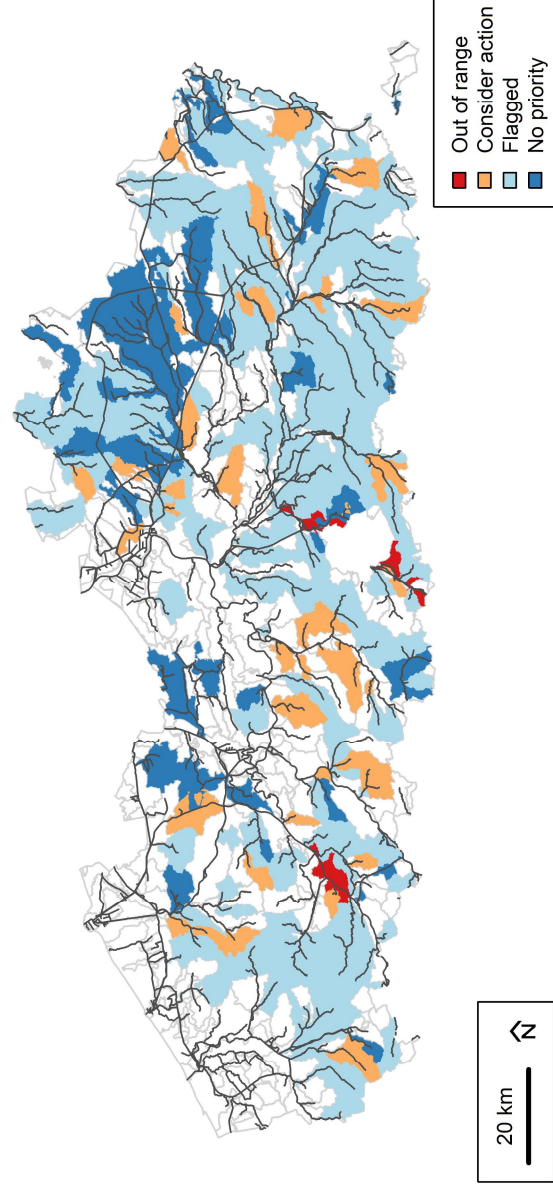

### 34. Sinuosity

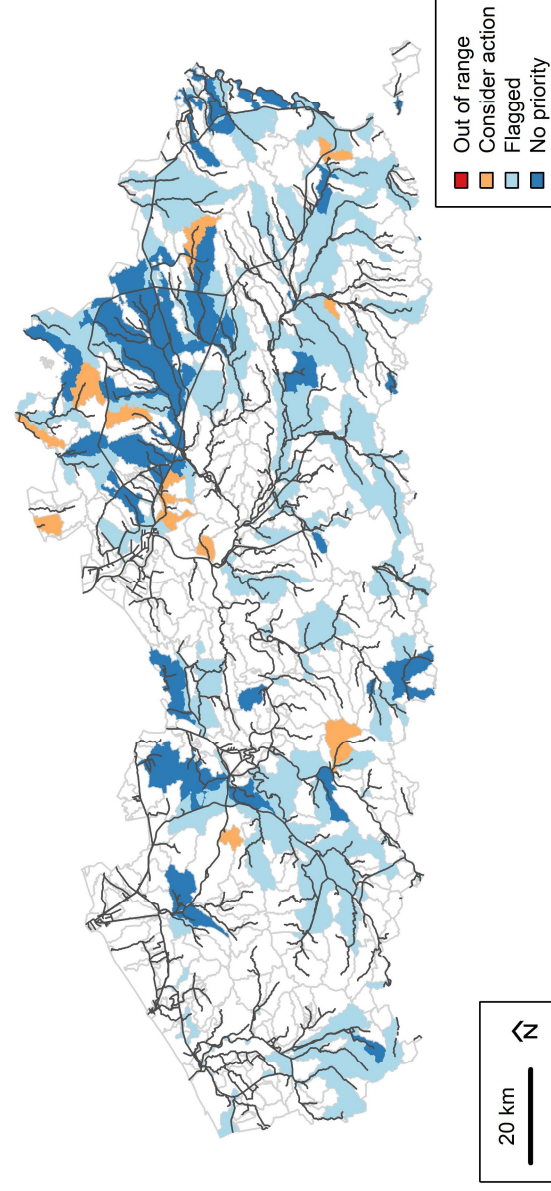

Supplement: s1 [file s1 › section D.pdf]
