# Supplementary material for: Setting Priorities in River Management Using Habitat Suitability Models
Source: MDPI journal article supplement (doi:10.3390/w13070886), 2021-03-24
Supplement: s1 [file s1]

Archive with 4 entries (4 files):
- Section A.pdf
- Section B.pdf
- Section C.pdf
- section D.pdf
