# Supplementary material for: Setting Priorities in River Management Using Habitat Suitability Models
Source: MDPI journal article supplement (doi:10.3390/w13070886), 2021-03-24
Supplement: s1 [file s1 › Section A.pdf]

## Section A: Description of datasets and study area

### Description of study area

Flanders is the northern region of Belgium. It is part of two international stream basin districts, the Scheldt and the Meuse. It has 11 stream basins. Its main land uses are agriculture (51%), urban land (30%) and forest (10%). In the province West-Flanders agriculture is the dominant land use (67.4%). To the east there are more nature areas with forest (18.3%). Still, even in the eastern province Limburg agriculture still remains the main land use (43.4%).

Water quality in Flanders has improved a lot in recent years because of the installation of new sanitation infrastructure and reducing the diffuse pollution from agriculture. Still, water quality in Flanders does not meet WFD requirements. In 2012 no Flemish waterbodies or local water bodies of the 1<sup>st</sup> order met all the requirements for reaching a good ecological status (Milieurapport 2013). Table A2 shows a summary of water quality indicators in 2012 for all Flemish water bodies and local water bodies of the 1<sup>st</sup> order. All water bodies had a moderate physical-chemical status. The biological quality according to the MMIF is good in 25% of the water bodies. Only 8% are in a very bad condition. The hydromorphological quality of most water bodies is bad to moderate.

**Table SA1.** Number of samples per river type and per ecological quality class.

| River Type                | Good Status | Moderate Status | Poor Status | Bad Status | Total |
|---------------------------|-------------|-----------------|-------------|------------|-------|
| Large Brook (Bg)          | 47          | 185             | 364         | 318        | 914   |
| Large Campine Brook (BgK) | 191         | 193             | 109         | 40         | 533   |
| Small Brook (Bk)          | 63          | 148             | 376         | 421        | 1008  |
| Small Campine Brook (BkK) | 142         | 216             | 198         | 104        | 660   |
| Large river (Rg)          | 71          | 257             | 534         | 293        | 1155  |
| Small river (Rk)          | 25          | 89              | 64          | 5          | 183   |
| Very Large river (Rzg)    | 2           | 21              | 5           | 0          | 28    |
| Total                     | 541         | 1109            | 1650        | 1181       | 4481  |

**Table SA2.** Percentage of samples per quality class for the ecological status based on macroinvertebrates, the physical-chemical status and the hydromorphological status.

| Ecological status | MMIF  | Physical-Chemical quality | Hydromorphological quality |
|-------------------|-------|---------------------------|----------------------------|
| Very good         | 0     | 0                         | 0                          |
| Good              | 26.26 | 0                         | 9.52                       |
| Moderate          | 32.40 | 100                       | 42.26                      |
| Bad               | 32.96 | 0                         | 44.05                      |
| Very bad          | 8.38  | 0                         | 4.17                       |

**Table SA3.** Overview of the input variables of the suitability models.

| Variable                                | Code  | Unit |
|-----------------------------------------|-------|------|
| Width erosion                           | WE    | -    |
| Width variation                         | WV    | -    |
| Presence of dead wood                   | PDW   | -    |
| Curvature erosion                       | CE    | -    |
| Micromeandering                         | MM    | -    |
| Presence of sediment banks              | PSB   | -    |
| Sinuosity class                         | SC    | -    |
| Sludge layer                            | SL    | -    |
| Substrate                               | Su    | -    |
| Presence of algae                       | PA    | -    |
| Presence of macrophytes                 | PM    | -    |
| Acidity                                 | Ph    | -    |
| Temperature                             | T     | °C   |
| Chlorine concentration                  | Cl    | mg/L |
| Electrical conductivity                 | EC20  | µs/L |
| Kjeldahl nitrogen concentration         | Kjn   | mg/L |
| Ammonium nitrogen concentration         | NH4   | mg/L |
| Nitrate nitrogen concentration          | NO3   | mg/L |
| Nitrite nitrogen concentration          | NO2   | mg/L |
| Orthophosphate phosphorus concentration | Opo4  | mg/L |
| Total phosphorus concentration          | Pt    | mg/L |
| Total suspended solids                  | TSS   | mg/L |
| Lateral connectivity                    | LC    | -    |
| Bank type                               | BT    | -    |
| Overhanging vegetation                  | OV    | -    |
| Water-related elements in the landscape | Wre   | -    |
| Stream pattern variation                | SP    | -    |
| Pool-riffle pattern                     | PR    | -    |
| Width                                   | W     | M    |
| Depth                                   | D     | M    |
| Biological oxygen Demand                | BOD   | mg/L |
| Chemical oxygen Demand                  | COD   | mg/L |
| Oxygen concentration                    | O2    | mg/L |
| Oxygen saturation                       | O2sat | %    |
