# Supplementary material for: Setting Priorities in River Management Using Habitat Suitability Models
Source: MDPI journal article supplement (doi:10.3390/w13070886), 2021-03-24
Supplement: s1 [file s1 › Section C.pdf]

## Section C: Details of individual elements in the method

**Table SC1.** Composition of ecological groups.

| Group | Taxa                                                                                                                                                                                                        |
|-------|-------------------------------------------------------------------------------------------------------------------------------------------------------------------------------------------------------------|
| 1     | Acroloxus, Armiger, Bathyomphalus, Gyraulus, Hippeutis, Physa, Planorbarius, Planorbis                                                                                                                      |
| 2     | Anodonta, Aplexa, Corbicula, Dreissena, Ferrissia, Lithoglyphus, Theodoxus, Unio, Valvata                                                                                                                   |
| 3     | Anisus, Pseudamnicola, Pseudanodonta, Segmentina, Viviparus                                                                                                                                                 |
| 4     | Aphelocheirus, Arctocorisa, Callicorixa, Dryopidae, Dytiscidae, Gomphus, Gyrinidae, Haliplidae, Hydraenidae, Hydrophilidae, Hygrobiidae, Naididae, Nepa, Noteridae, Notonecta, Paracorixa, Scirtidae        |
| 5     | Ampharetidae, Ceratopogonidae, Chaoboridae, Dolichopodidae, Empididae, Gammaridae, Limoniidae, Psychodidae, Rhagionidae, Sciomyzidae, Tabanidae, Tubificidae                                                |
| 6     | Athericidae, Dixidae, Ptychopteridae, Heptagenia, Elminthidae, Isoperla, Leuctra, Nemoura, Philopotamidae, Protonemura, Nemurella, Rhyacophilidae, Sericostomatidae, Amphinemura, Glossosomatidae, Goeridae |
| 7     | Baetis, Brachycercus, Ephemera, Ephemerella, Leptophlebia, Paraleptophlebia, Velia, Beraeidae, Brachycentridae, Calopteryx, Cordulegaster, Hydroptilidae, Lepidostomatidae, Leptoceridae, Limnephilidae     |
| 8     | Caenis, Cloeon, Ecnomidae, Proclaeon, Centropetulum                                                                                                                                                         |
| 9     | Corixa, Cymatia, Gerris, Glaenocorisa, Hesperocorixa, Hydrometra, Ilyocoris, Mesovelia, Microvelia, Naucoris, Plea, Ranatra, Sigara, Argulidae, Phryganeidae, Micronecta                                    |
| 10    | Bithynia, Physella, Pisidium, Potamopyrgus, Sphaerium, Lymnaea, Asellidae, Polychaeta, Chironomidae non Thummi-Plumosus, Lumbricidae, Lumbriculidae, Simuliidae                                             |
| 11    | Aeshna, Anax, Cercion, Ceriagrion, Coenagrion, Cordulia, Crocothemis, Enallagma, Erythromma, Ischnura, Nehalennia, Orthetrum, Pyrrhosoma, Somatochlora, Sympecma, Sympetrum, Lestes, Libellula, Platycnemis |
| 12    | Dendrocoelum, Dugesia, Erpobdella, Glossiphonia, Haemaphys, Helobdella, Hemiclepsis, Piscicola, Planaria, Polycelis, Theromyzon, Trocheta                                                                   |
| 13    | Atyidae, Cambaridae, Copepoda, Corophiidae, Crangonyctidae, Grapsidae, Janiridae, Limnadiidae, Mysidae, Palaemonidae, Talitridae                                                                            |
| 14    | Culicidae, Muscidae, Stratiomyidae, Chironomidae Thummi-Plumosus, Ephydriidae, Syrphidae, Tipulidae                                                                                                         |
| 15    | Hydropsychidae, Polycentropodidae, Psychomyidae                                                                                                                                                             |

**Table SC2.** Taxa reference lists with base (B) and critical (C) taxa.

| Taxon                            | Bg | BgK | Bk | BkK | Rg | Rk | Rzg |
|----------------------------------|----|-----|----|-----|----|----|-----|
| Acroloxus                        |    |     |    |     |    | C  | C   |
| Ancylus                          |    |     |    |     |    |    | C   |
| Anisus                           | B  |     | B  |     |    | B  |     |
| Asellidae                        | B  | B   | B  | B   | B  | B  | B   |
| Baetis                           | C  | C   |    | C   |    |    |     |
| Bithynia                         | B  | B   | B  |     | B  | B  | B   |
| Caenis                           |    |     |    |     | C  | C  | C   |
| Calopteryx                       |    | C   |    | C   |    |    | C   |
| Chironomidae non thummi-plumosus | B  | B   | B  | B   | B  | B  | B   |
| Chironomidae thummi-plumosus     | B  |     | B  |     |    | B  | B   |
| Cloeon                           | C  | C   | C  | C   |    | C  |     |
| Coenagrion                       |    |     |    |     | C  |    |     |

| Taxon             | Bg | BgK | Bk | BkK | Rg | Rk | Rzg |
|-------------------|----|-----|----|-----|----|----|-----|
| Corophiidae       |    |     |    |     | B  |    | B   |
| Crangonyctidae    |    |     |    |     |    | B  |     |
| Dendrocoelum      |    |     | B  |     |    |    | B   |
| Dreissena         |    |     |    |     | B  |    | B   |
| Dugesia           | B  | B   | B  |     | B  | B  | B   |
| Dytiscidae        | B  | B   | B  | B   |    | B  |     |
| Ecnomidae         |    |     |    |     | C  |    | C   |
| Elminthidae       |    | C   | C  |     | C  |    |     |
| Erpobdella        | B  | B   | B  | B   | B  | B  | B   |
| Gammaridae        | B  | B   | B  | B   | B  | B  | B   |
| Gerris            |    |     |    |     |    | C  |     |
| Glossiphonia      | B  | B   | B  | B   | B  | B  | B   |
| Goeridae          | C  |     |    |     |    |    |     |
| Gyraulus          | C  | C   | C  | C   | C  | C  | C   |
| Haliplidae        | C  | C   | C  | C   |    | C  | C   |
| Helobdella        | B  | B   | B  | B   | B  | B  |     |
| Hydrophilidae     |    |     |    |     |    | B  |     |
| Hydropsychidae    |    | C   |    | C   |    |    | C   |
| Hydroptilidae     |    |     |    |     | C  |    |     |
| Ischnura          | C  | C   | C  |     | C  | C  | C   |
| Leptoceridae      | C  | C   | C  | C   | C  | C  | C   |
| Lymnaea           | B  | B   | B  | B   | B  | B  | B   |
| Micronecta        |    |     |    |     | C  | C  |     |
| Naididae          |    | B   | B  | B   | B  | B  |     |
| Nemoura           |    |     |    | C   |    |    |     |
| Notonecta         | B  |     | B  |     |    |    |     |
| Physa             | B  | B   | B  | B   | B  | B  |     |
| Piscicola         |    |     |    |     | B  | B  |     |
| Pisidium          | B  | B   | B  | B   | B  |    | B   |
| Planorbis         |    |     | C  |     |    |    |     |
| Polycentropodidae |    | C   |    |     | C  |    |     |
| Psychomyidae      |    |     |    |     |    |    | C   |
| Rhyacophilidae    | C  |     |    |     |    |    |     |
| Sialis            |    |     |    | B   |    |    |     |
| Sigara            | B  | B   | B  | B   |    | B  |     |
| Simuliidae        |    | B   |    | B   |    |    |     |
| Sphaerium         | B  | B   | B  | B   | B  |    | B   |
| Theromyzon        | B  |     | B  |     |    | B  |     |
| Tubificidae       | B  | B   | B  | B   | B  | B  | B   |
| Valvata           | C  |     | C  | C   | C  | C  | C   |
